# Supplementary material for: Canker Development and Biocontrol Potential of CHV-1 Infected English Isolates of Cryphonectria parasitica Is Dependent on the Virus Concentration and the Compatibility of the Fungal Inoculums
Source: MDPI journal article supplement (doi:10.3390/v14122678), 2022-11-29
Supplement: s1 [file s1]

**Supplementary Table S1.** Correlation results among all the tested parameters in assay I, using seedlings.

| ASSAY I<br>USING<br>SEEDLINGS               |                                                   | End-point PCRs                                                    |                                            |                                      | Real-time PCRs                                     |                              |                                           | Virus<br>copy<br>number          |                                    |
|---------------------------------------------|---------------------------------------------------|-------------------------------------------------------------------|--------------------------------------------|--------------------------------------|----------------------------------------------------|------------------------------|-------------------------------------------|----------------------------------|------------------------------------|
|                                             |                                                   | Inoculum<br>number                                                | Virus<br>strain<br>(0 None, 1 E-5, 2 L-18) | Lesion<br>area<br>(mm <sup>2</sup> ) | Original<br>virus<br>concentra-<br>tion<br>(ng/ul) | Qiagen<br>Extract<br>(ng/ul) | Takara<br>Dye<br>Toothpic<br>k<br>(ng/ul) | Takara III<br>Extract<br>(ng/ul) | Takara III<br>Toothpick<br>(ng/ul) |
| Inoculum<br>number                          | Pearson<br>Correlation<br><br>Sig. (2-<br>tailed) | 1                                                                 |                                            |                                      |                                                    |                              |                                           |                                  |                                    |
| Virus strain<br>(0 None, 1 E-<br>5, 2 L-18) | Pearson<br>Correlation<br><br>Sig. (2-<br>tailed) | -0.621<br>6.852E-6                                                | 1                                          |                                      |                                                    |                              |                                           |                                  |                                    |
| Lesion area<br>(mm <sup>2</sup> )           | Pearson<br>Correlation<br><br>Sig. (2-<br>tailed) | 0.754<br>3.519E-9                                                 | -0.628<br>4.928E-6                         | 1                                    |                                                    |                              |                                           |                                  |                                    |
| Original virus<br>concentration<br>(ng/ul)  | Pearson<br>Correlation<br><br>Sig. (2-<br>tailed) | -0.882<br>2.587E-15                                               | 0.818<br>1.270E-11                         | -0.738<br>1.084E-8                   | 1                                                  |                              |                                           |                                  |                                    |
| Qiagen Extract<br>(ng/ul)                   | Pearson<br>Correlation<br><br>Sig. (2-<br>tailed) | -0.801<br>6.318E-11                                               | 0.657<br>1.243E-6                          | -0.695<br>1.659E-7                   | 0.854<br>1.701E-13                                 | 1                            |                                           |                                  |                                    |
| Takara Dye<br>Toothpick<br>(ng/ul)          | Pearson<br>Correlation<br><br>Sig. (2-<br>tailed) | -0.802<br>6.111E-11                                               | 0.657<br>1.251E-6                          | -0.695<br>1.657E-7                   | 0.854<br>1.705E-13                                 | 1.000<br>3.355E-106          | 1                                         |                                  |                                    |
| Takara III<br>Extract<br>(ng/ul)            | Pearson<br>Correlation<br><br>Sig. (2-<br>tailed) | -0.802<br>6.281E-11                                               | 0.658<br>1.239E-6                          | -0.695<br>1.659E-7                   | 0.854<br>1.743E-13                                 | 1.000<br>1.6E-103            | 1.000<br>5.19E-112                        | 1                                |                                    |
| Takara III<br>Toothpick<br>(ng/ul)          | Pearson<br>Correlation<br><br>Sig. (2-<br>tailed) | -0.774<br>6.248E-11                                               | 0.636<br>1.264E-6                          | -0.665<br>1.672E-7                   | 0.832<br>1.760E-13                                 | 0.984<br>5.289E-111          | 0.984<br>2.181E-119                       | 0.984<br>1.383E-112              | 1                                  |
| Virus copy<br>number                        | Pearson<br>Correlation<br><br>Sig. (2-<br>tailed) | -0.205<br>0.181                                                   | 0.325<br>0.031                             | -0.227<br>0.138                      | 0.247<br>0.107                                     | 0.510<br>0.0004              | 0.510<br>0.0004                           | 0.510<br>0.0003                  | 0.507<br>0.0004                    |
|                                             |                                                   | Negative correlation is significant at the 0.05 level (2-tailed). |                                            |                                      |                                                    |                              |                                           |                                  |                                    |
|                                             |                                                   | Positive correlation is significant at the 0.05 level (2-tailed). |                                            |                                      |                                                    |                              |                                           |                                  |                                    |
| N                                           |                                                   | 44                                                                | 44                                         | 44                                   | 44                                                 | 44                           | 44                                        | 44                               | 44                                 |

**Supplementary Table S2.** Correlation results among all the tested parameters in assay I, using branches.

| ASSAY I USING BRANCHES               |                                     | End-point PCRs Real-time PCRs                                     |                                      |                                |                                      |                            |                              |                            |                              | Virus copy number |
|--------------------------------------|-------------------------------------|-------------------------------------------------------------------|--------------------------------------|--------------------------------|--------------------------------------|----------------------------|------------------------------|----------------------------|------------------------------|-------------------|
|                                      |                                     | Inoculum number                                                   | Virus strain (0 None, 1 E-5, 2 L-18) | Lesion area (mm <sup>2</sup> ) | Original virus concentration (ng/ul) | Qiagen Extract (ng/ul)     | Takara Dye Toothpick (ng/ul) | Takara III Extract (ng/ul) | Takara III Toothpick (ng/ul) |                   |
| Inoculum number                      | Pearson Correlation Sig. (2-tailed) | 1                                                                 |                                      |                                |                                      |                            |                              |                            |                              |                   |
| Virus strain (0 None, 1 E-5, 2 L-18) | Pearson Correlation Sig. (2-tailed) | -0.621059003<br>1.149E-4                                          | 1                                    |                                |                                      |                            |                              |                            |                              |                   |
| Lesion area (mm <sup>2</sup> )       | Pearson Correlation Sig. (2-tailed) | 0.74075626<br>8.25551E-07                                         | -0.573329364<br>4.872E-4             | 1                              |                                      |                            |                              |                            |                              |                   |
| Original virus concentration (ng/ul) | Pearson Correlation Sig. (2-tailed) | -0.763085723<br>2.42429E-07                                       | 0.947139243<br>7.39719E-17           | -0.618621356<br>1.244E-4       | 1                                    |                            |                              |                            |                              |                   |
| Qiagen Extract (ng/ul)               | Pearson Correlation Sig. (2-tailed) | -0.631351624<br>8.15436E-05                                       | 0.701417699<br>5.43413E-06           | -0.536603299<br>1.285E-3       | 0.808636403<br>1.24752E-08           | 1                          |                              |                            |                              |                   |
| Takara Dye Toothpick (ng/ul)         | Pearson Correlation Sig. (2-tailed) | -0.677587885<br>1.4805E-05                                        | 0.764437702<br>2.24142E-07           | -0.567765792<br>5.684E-4       | 0.850110249<br>3.84052E-10           | 0.946747663<br>8.27108E-17 | 1                            |                            |                              |                   |
| Takara III Extract (ng/ul)           | Pearson Correlation Sig. (2-tailed) | -0.694589536<br>7.3123E-06                                        | 0.658301711<br>3.12419E-05           | -0.547004191<br>9.873E-4       | 0.81279874<br>9.15058E-09            | 0.952502458<br>1.46261E-17 | 0.936502481<br>1.17742E-15   | 1                          |                              |                   |
| Takara III Toothpick (ng/ul)         | Pearson Correlation Sig. (2-tailed) | -0.765735589<br>2.07785E-07                                       | 0.798113709<br>2.64421E-08           | -0.5992026<br>2.290E-4         | 0.907321694<br>3.36468E-13           | 0.927070585<br>9.42806E-15 | 0.945964974<br>1.03136E-16   | 0.943959032<br>1.78935E-16 | 1                            |                   |
| Virus copy number                    | Pearson Correlation Sig. (2-tailed) | -0.33596088<br>0.05593902                                         | 0.10597614<br>0.5572241              | -0.1840679<br>0.30516821       | 0.26755686<br>0.13223907             | 0.51294676<br>2.269E-3     | 0.43727226<br>1.093E-2       | 0.51182069<br>2.329E-3     | 0.54341257<br>1.082E-3       | 1                 |
|                                      |                                     | Negative correlation is significant at the 0.05 level (2-tailed). |                                      |                                |                                      |                            |                              |                            |                              |                   |
|                                      |                                     | Positive correlation is significant at the 0.05 level (2-tailed). |                                      |                                |                                      |                            |                              |                            |                              |                   |
|                                      | N                                   | 33                                                                | 33                                   | 33                             | 33                                   | 33                         | 33                           | 33                         | 33                           | 33                |
